# Supplementary material for: Gold nanoparticle-loaded MoS2 nanosheets with peroxidase-like and pyranose oxidase-like activities for bio-enzyme-free visual detection of glucose, xylose and galactose
Source: Royal Society of Chemistry journal article supplement (doi:10.1039/d4ma00086b), 2024-01-01
Supplement: d4ma00086b1.pdf [file d4ma00086b1.pdf]

Electronic Supplementary Information for

**A gold nanoparticles-loaded MoS<sub>2</sub> nanosheets with peroxidase-like and pyranose oxidase-like activities for bio-enzyme-free visual detection of glucose, xylose and galactose**

Shilan Fu<sup>†‡</sup>, Junfeng Liu<sup>†</sup>, Siqi Wu<sup>†</sup>, Lin Zhang<sup>†</sup>, Xu Zhang<sup>\*†</sup>, FengFu Fu<sup>\*†</sup>

<sup>†</sup>Key Laboratory for Analytical Science of Food Safety and Biology of MOE, Fujian Provincial Key Lab of Analysis and Detection for Food Safety, College of Chemistry, Fuzhou University, Fuzhou, Fujian 350116, China

<sup>‡</sup>College of Chemistry and Materials Science, Fujian Normal University, Fuzhou, Fujian 350117, China

<sup>\*</sup>Corresponding Author: fengfu@fzu.edu.cn (F.-F Fu); 1959392119@qq.com (X. Zhang)

## 1. Main materials and apparatus

Pure xylose, glucose, galactose, maltose, fructose, sucrose and sodium citrate ( $\text{C}_6\text{H}_5\text{O}_7\text{Na}_3 \cdot 2\text{H}_2\text{O}$ ) were purchased from Sangon Biotech Co., Ltd (Shanghai, China). The sodium borohydride ( $\text{NaBH}_4$ ), acetic acid ( $\text{CH}_3\text{COOH}$ ), sodium acetate ( $\text{CH}_3\text{CO}_2\text{Na} \cdot 3\text{H}_2\text{O}$ ), trichloroacetic acid, acetonitrile and chloroform were obtained from Aladdin Company (Shanghai, China). 3,3',5,5'-Tetramethylbenzidine (TMB) were purchased from Shanghai Titan Technology Co., Ltd (China). All reagents are of analytical grade or ultrapure grade, and were used without any further purification. The water used in the experiment is Milli-Q water ( $18.2 \text{ M}\Omega \cdot \text{cm}$ ), which was prepared with Millipore pure system.

A Talos F200S G2 field transmission electron microscopy (TEM) (FEI, Netherlands) together with an energy dispersive X-ray spectroscopy (EDX) was used to obtain TEM images and EDX mapping. The X-ray diffraction (XRD) analysis was carried out with a Ultima IV X-ray diffractometer (Rigaku, Japan). The UV-visible spectrometry was performance with an Infinite 200 Pro microplate reader (Tecan, Switzerland). An Esca Lab 250 X-ray photoelectron spectrometer (XPS, Thermo Fisher Scientific Company, USA) was used for the X-ray photoelectron spectroscopy (XPS) analysis.

**Table S1:** Comparison on the apparent Michaelies-Menten constant ( $K_m$ ) and maximum reaction rate ( $V_{max}$ ) among AuNPs@MoS<sub>2</sub> dual-active nanozyme, HRP and GOx.

|                        | Substrate                     | $K_m$ (mM) | $V_{max}$ (mol/L s)   |
|------------------------|-------------------------------|------------|-----------------------|
| AuNPs@MoS <sub>2</sub> | H <sub>2</sub> O <sub>2</sub> | 1.31       | $1.36 \times 10^{-6}$ |
| HRP                    | H <sub>2</sub> O <sub>2</sub> | 1.01       | $2.66 \times 10^{-6}$ |
| AuNPs@MoS <sub>2</sub> | TMB                           | 0.044      | $5.60 \times 10^{-8}$ |
| HRP                    | TMB                           | 0.079      | $1.27 \times 10^{-7}$ |
| AuNPs@MoS <sub>2</sub> | Glucose                       | 0.448      | $5.80 \times 10^{-7}$ |
| GOx                    | Glucose                       | 0.646      | $9.87 \times 10^{-7}$ |

**Table S2:** Analytical performances of the developed bio-enzyme-free colorimetric methods for the detection of glucose, xylose and galactose based on AuNPs@MoS<sub>2</sub>

| Analyte   | Equation                           | Linear range | Visual LOD | Spectrometry LOD | RSD (n=5)                       |
|-----------|------------------------------------|--------------|------------|------------------|---------------------------------|
| Glucose   | $A_{652}=0.2699 \times C + 0.1178$ | 0.0 - 0.7 mM | 0.3 mM     | 11.0 $\mu$ M     | 4 % (detecting 0.3 mM glucose)  |
| Xylose    | $A_{652}=0.3825 \times C + 0.1077$ | 0.0 - 0.7 mM | 0.3 mM     | 8.0 $\mu$ M      | 3% (detecting 0.3 mM xylose)    |
| Galactose | $A_{652}=0.6187 \times C + 0.0980$ | 0.0 - 0.5 mM | 0.2 mM     | 5.0 $\mu$ M      | 2% (detecting 0.2 mM galactose) |

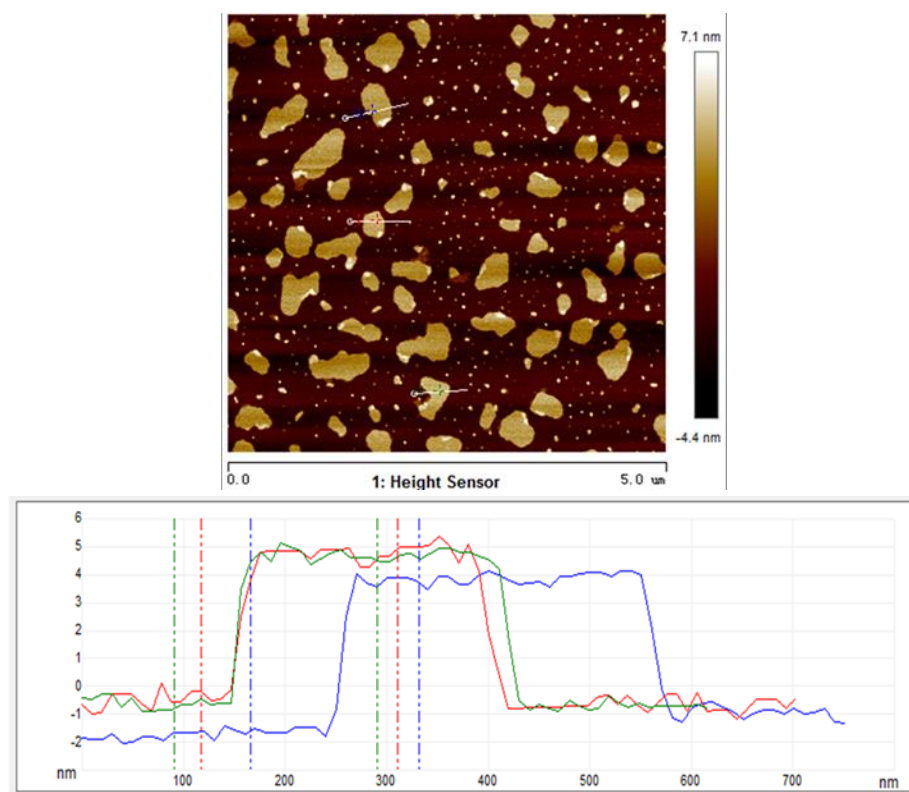

**Figure S1:** The AFM analysis of the MoS<sub>2</sub> nanosheets, which used to prepare AuNPs@MoS<sub>2</sub> nanozyme.

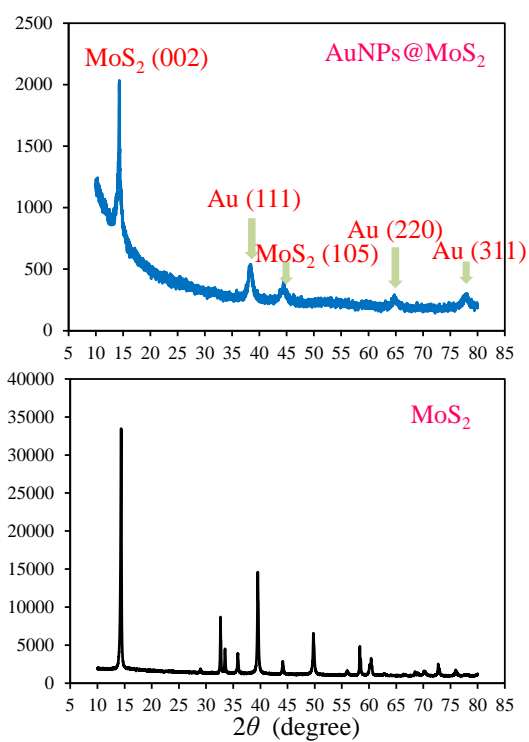

**Figure S2:** The XRD spectra of MoS<sub>2</sub> used to prepare MoS<sub>2</sub> nanosheets and the prepared AuNPs@MoS<sub>2</sub> nanozyme.

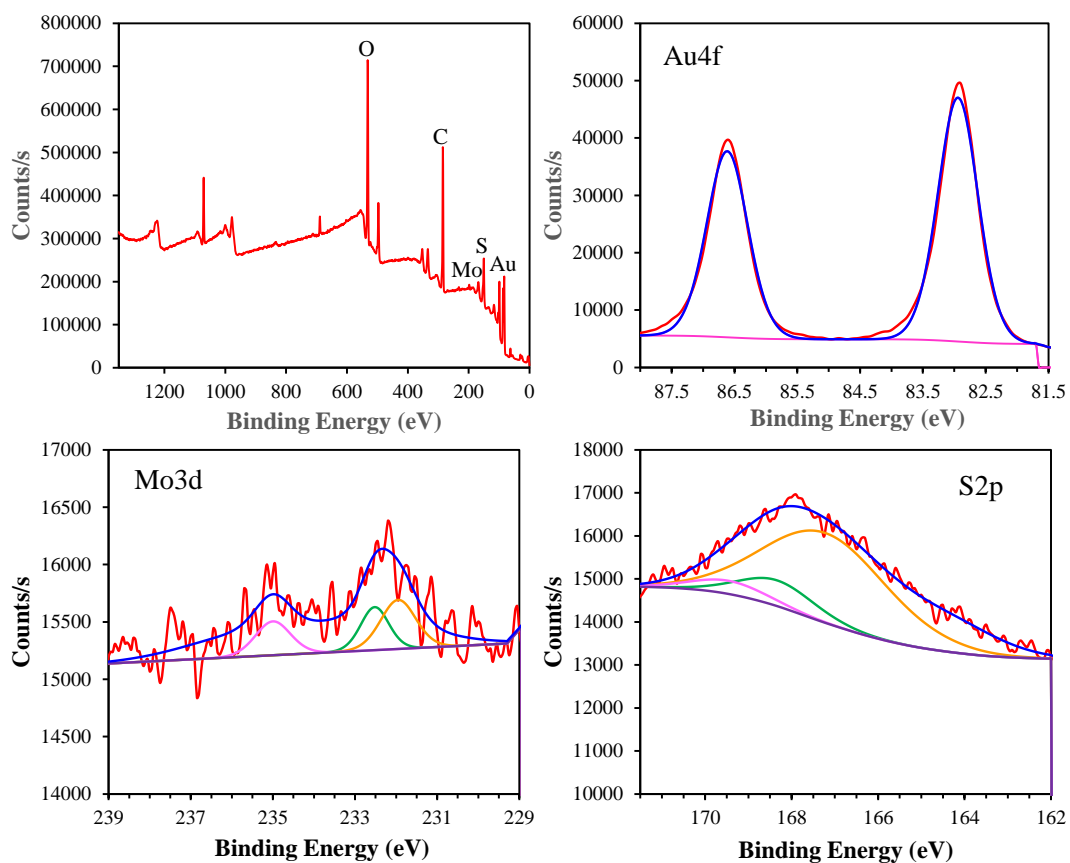

**Figure S3:** The X-ray photoelectron spectroscopy (XPS) analysis of the prepared AuNPs@MoS<sub>2</sub> nanozyme.

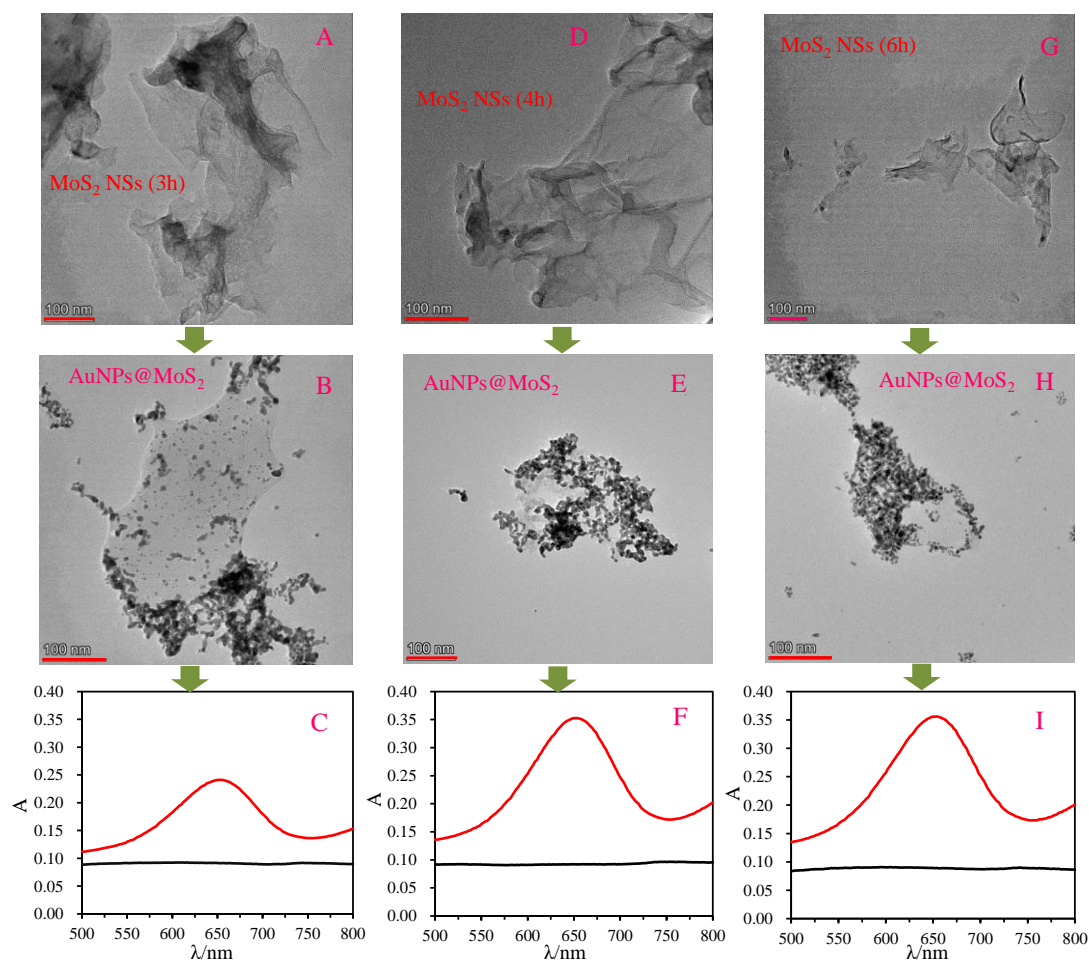

**Figure S4:** The TEM image of the prepared MoS<sub>2</sub> nanosheets under different time of ultra-sonication and the corresponding AuNPs@MoS<sub>2</sub> nanozyme, and the dual enzyme-like activities characterization of the prepared AuNPs@MoS<sub>2</sub> nanozyme. 3 hours (A, B, C), 4 hours (D, E, F) and 5 hours (G, H, I). The dual enzyme-like activities characterization was performed by directly using AuNPs@MoS<sub>2</sub> to catalyze the tandem reactions of glucose oxidation and H<sub>2</sub>O<sub>2</sub>-mediated oxidation of TMB, according to the procedure of 2.4 in experimental section. The concentration of glucose is 2.0 mM.

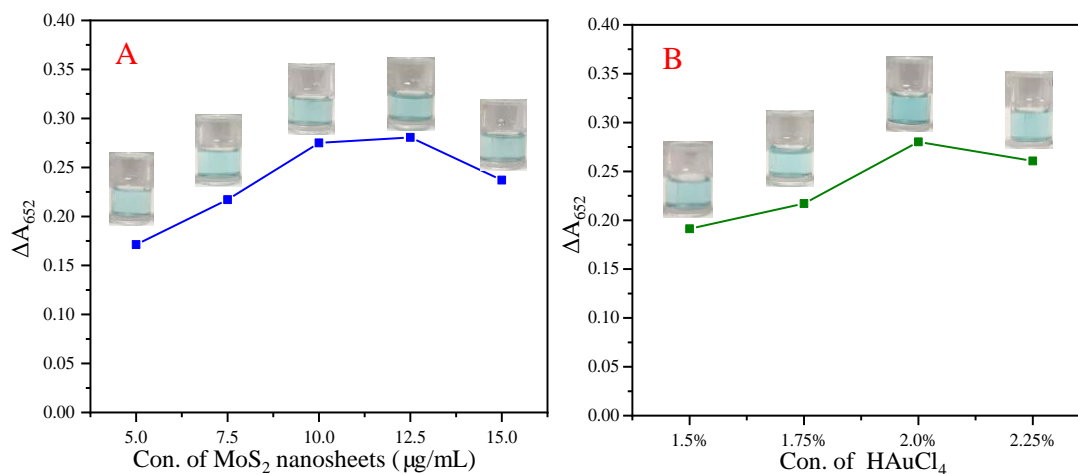

**Figure S5:** The effect of MoS<sub>2</sub> nanosheet concentration on the dual enzyme-like activities of the prepared AuNPs@MoS<sub>2</sub> nanozyme (A); the effect of HAuCl<sub>4</sub> concentration on the dual enzyme-like activities of the prepared AuNPs@MoS<sub>2</sub> nanozyme (B). The dual enzyme-like activities characterization was performed by directly using AuNPs@MoS<sub>2</sub> to catalyze the tandem reactions of glucose oxidation and H<sub>2</sub>O<sub>2</sub>-mediated oxidation of TMB, according to the procedure of 2.4 in experimental section. The concentration of glucose is 2.0 mM.



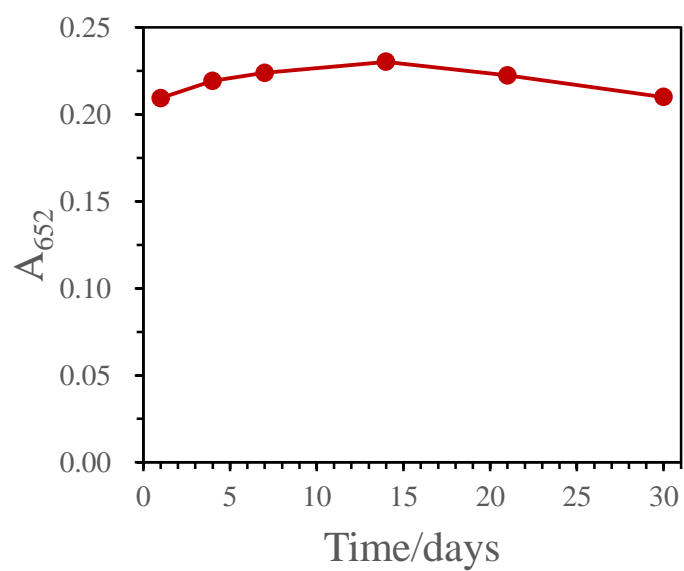

**Figure S6:** The variation of absorbance at 652 nm for detecting 0.5 mM glucose by using AuNPs@MoS<sub>2</sub>, which was stored at 5 °C for different days. Data was obtained under the optimal selection of glucose detection method described in text.

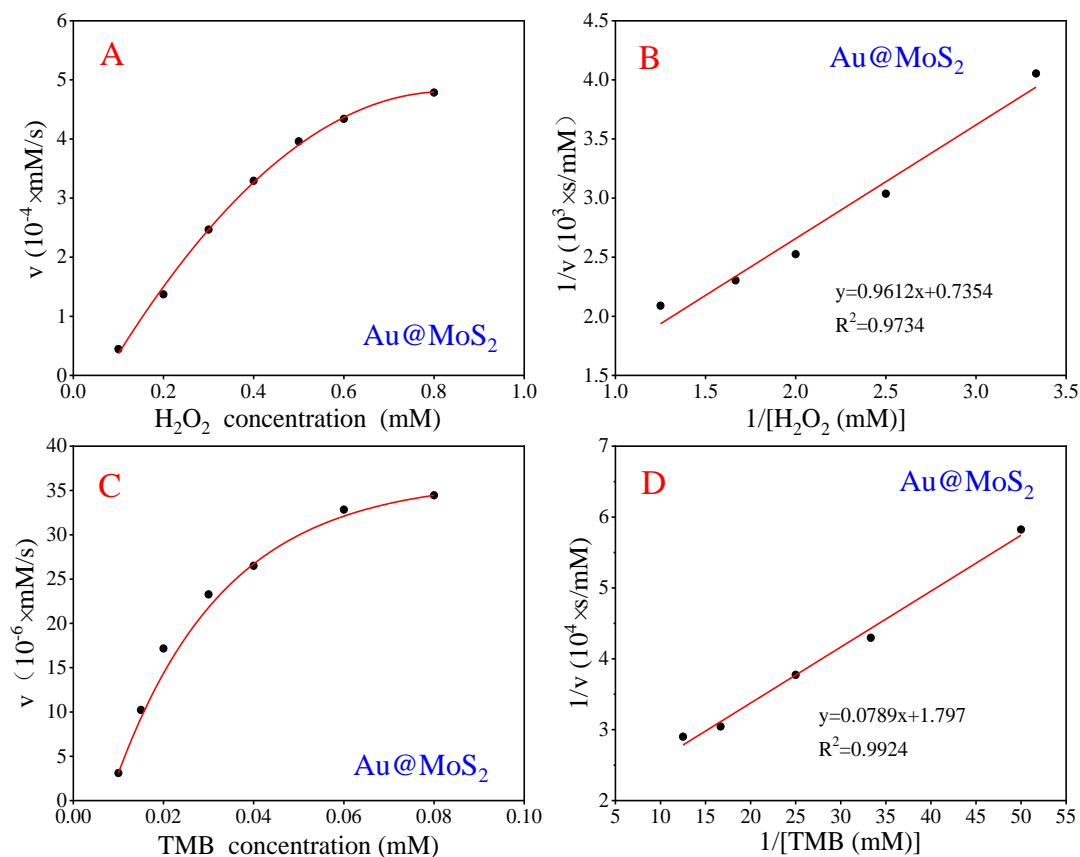

**Figure S7:** Steady-state kinetic analysis of AuNPs@MoS<sub>2</sub> as HRP mimics. The velocity of the reaction was measured by using 50  $\mu\text{L}$  of AuNPs@MoS<sub>2</sub> in acetic acid/sodium acetate buffer (200 mM, pH 4.6) with a total volume of 200  $\mu\text{L}$ . A: The time-reaction velocity variation of  $\text{H}_2\text{O}_2$  under 0.1 mM of TMB; B: Double reciprocal plots of velocity versus  $\text{H}_2\text{O}_2$  concentration at 0.1 mM TMB; C: The time-reaction velocity variation of TMB under 1.0 mM of  $\text{H}_2\text{O}_2$ ; D: Double reciprocal plots of velocity versus TMB concentration at 1.0 mM  $\text{H}_2\text{O}_2$ .

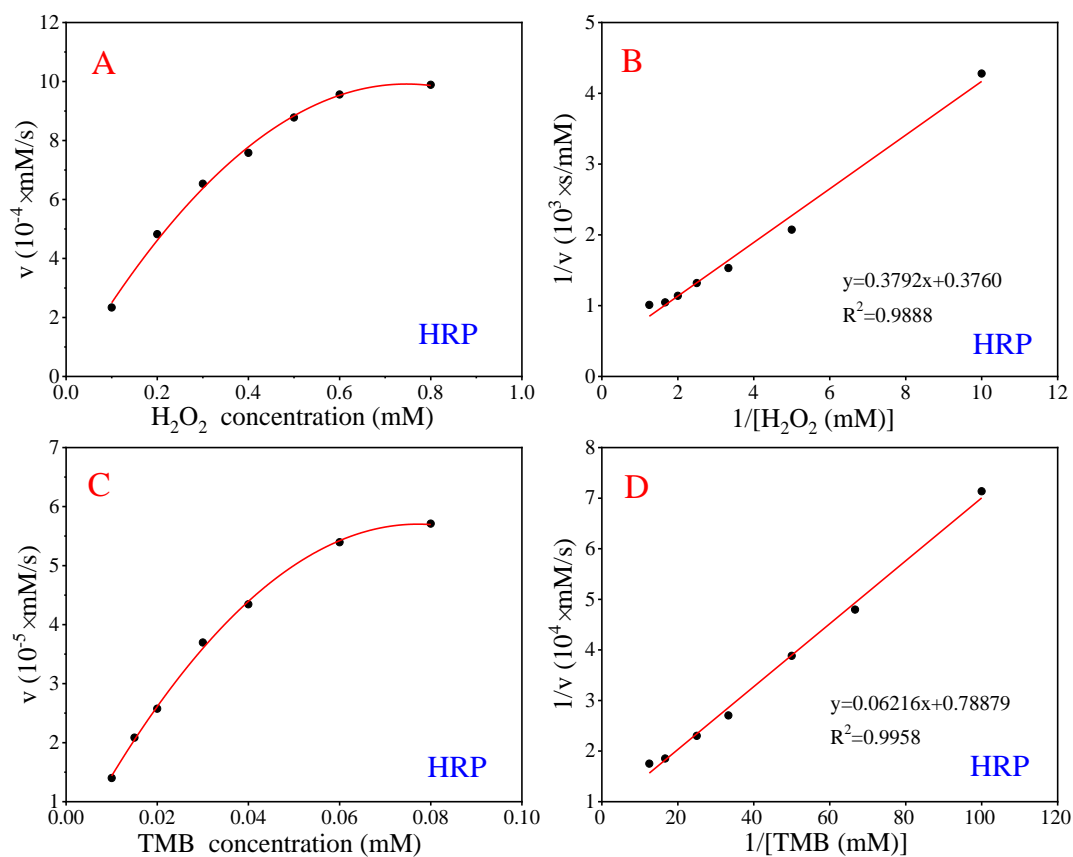

**Figure S8:** Steady-state kinetic analysis of natural HRP. The velocity of the reaction was measured by using 0.5 ng/mL of HRP in acetic acid/sodium acetate buffer (200 mM, pH 4.6). A: The time-reaction velocity variation of  $H_2O_2$  under 0.1 mM of TMB; B: Double reciprocal plots of velocity versus  $H_2O_2$  concentration at 0.1 mM TMB; C: The time-reaction velocity variation of TMB under 1.0 mM of  $H_2O_2$ ; D: Double reciprocal plots of velocity versus TMB concentration at 1.0 mM  $H_2O_2$ .

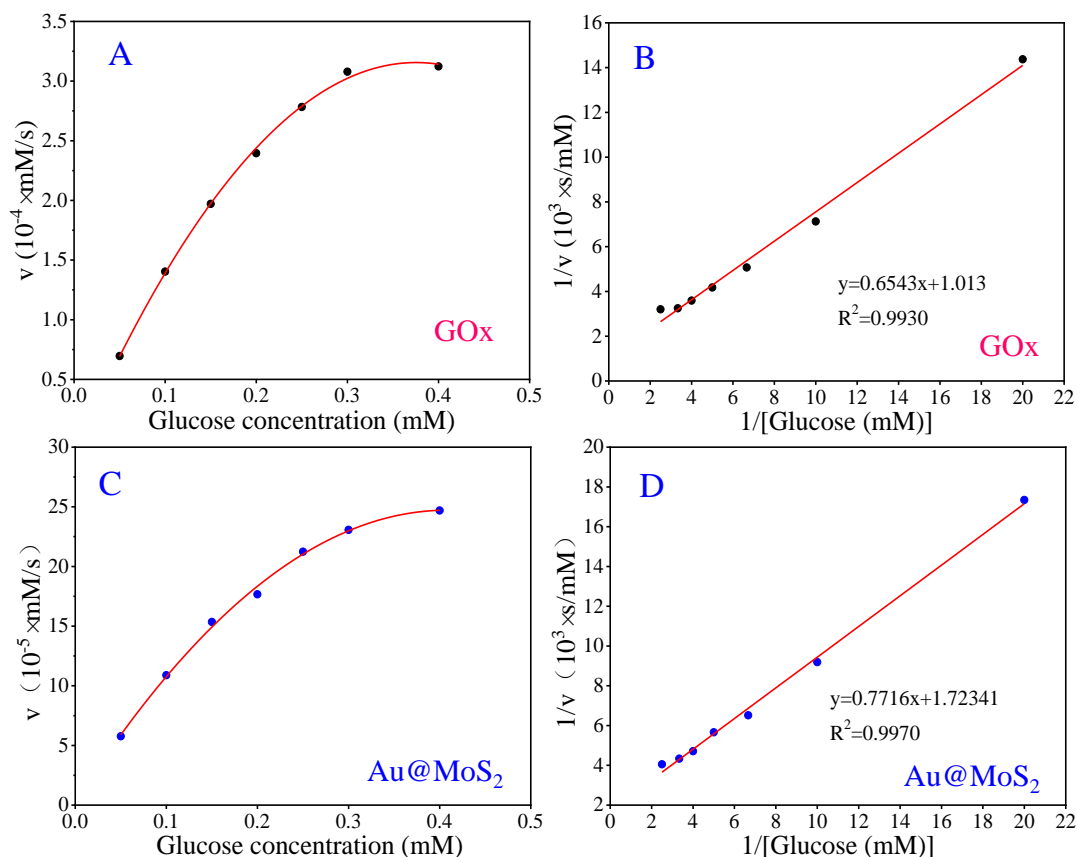

**Figure S9:** Steady-state kinetic analysis of natural GOx and AuNPs@MoS<sub>2</sub> as GOx mimics. The velocity of the reaction was measured in acetic acid/sodium acetate buffer (200 mM, pH 4.6). The concentration of HRP is 15  $\mu\text{g/mL}$ , and the amount of AuNPs@MoS<sub>2</sub> is 60  $\mu\text{L}$  in a total volume of 200  $\mu\text{L}$ . A: The time-reaction velocity variation of glucose under GOx catalysis; B: Double reciprocal plots of velocity versus glucose concentration under GOx catalysis; C: The time-reaction velocity variation of glucose under AuNPs@MoS<sub>2</sub> catalysis; D: Double reciprocal plots of velocity versus glucose concentration under AuNPs@MoS<sub>2</sub> catalysis.

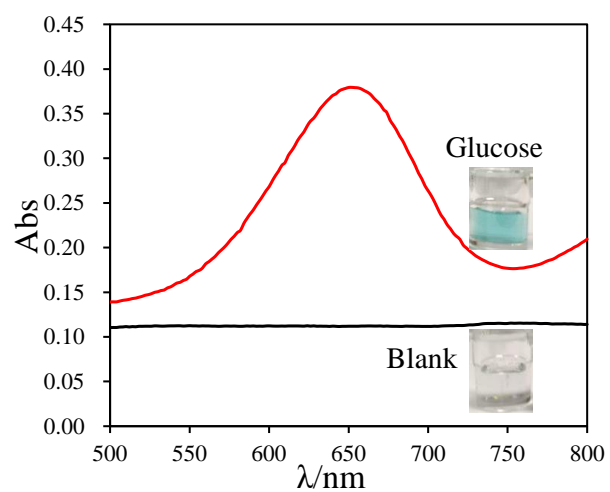

**Figure S10:** The photographs and absorption spectra of TMB solution in the presence of AuNPs@MoS<sub>2</sub> nanozyme together with glucose and AuNPs@MoS<sub>2</sub> without glucose (blank). The concentration of glucose is 2.0 mM.

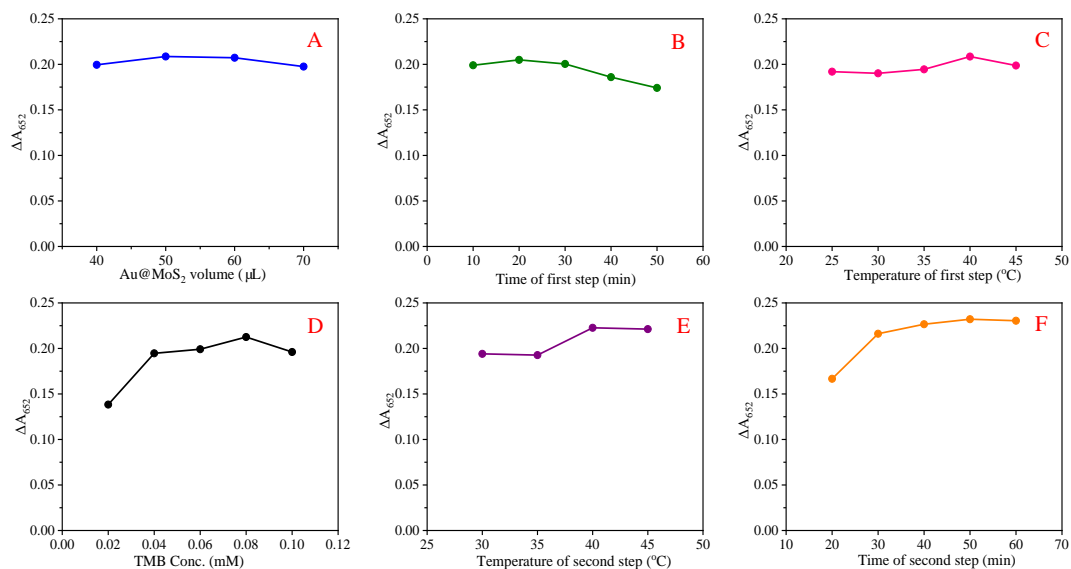

**Figure S11:** The effect of AuNPs@MoS<sub>2</sub> volume (A), the reaction time (B) and temperature (C) between AuNPs@MoS<sub>2</sub> and glucose, TMB concentration (D), and the reaction temperature (E) and time (F) between AuNPs@MoS<sub>2</sub> and TMB on the sensitivity of the method for the detection of glucose. Data were obtained under the optimal selection described in text except that will be optimized. The concentration of glucose is 1.0 mM.

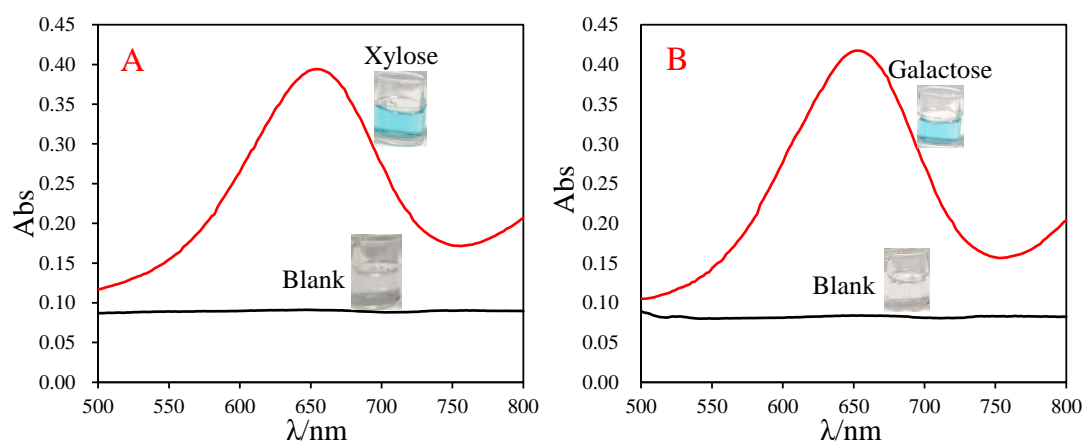

**Figure S12:** The photographs and absorption spectra of TMB solution in the presence of AuNPs@MoS<sub>2</sub> nanozyme together with xylose (A) or galactose (B), and AuNPs@MoS<sub>2</sub> without xylose or galactose (blank in A and B). The concentration of xylose or galactose is 2.0 mM.

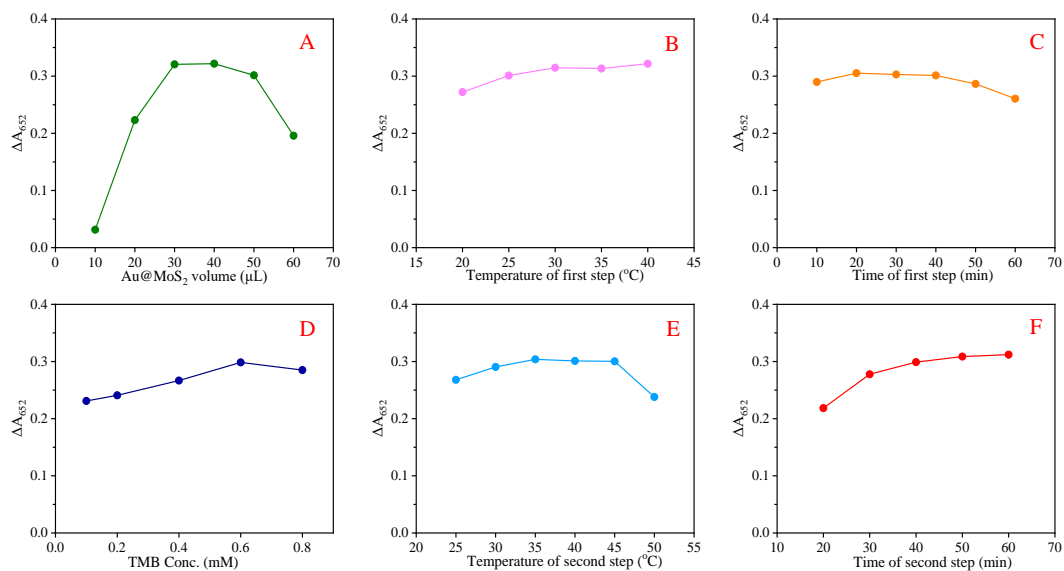

**Figure S13:** The effect of AuNPs@MoS<sub>2</sub> volume (A), the reaction temperature (B) and time (C) between AuNPs@MoS<sub>2</sub> and xylose or galactose, TMB concentration (D), and the reaction temperature (E) and time (F) between AuNPs@MoS<sub>2</sub> and TMB on the sensitivity of the method for the detection of xylose or galactose. Data were obtained under the optimal selection described in text except that will be optimized. The concentration of xylose or galactose is 2.0 mM.
